# Supplementary material for: An ELISA-based method for Galleria mellonella apolipophorin-III quantification
Source: PeerJ journal article supplement (doi:10.7717/peerj.17117), 2024-03-15
Supplement: Figures1S.pdf [file Figures1S.pdf]

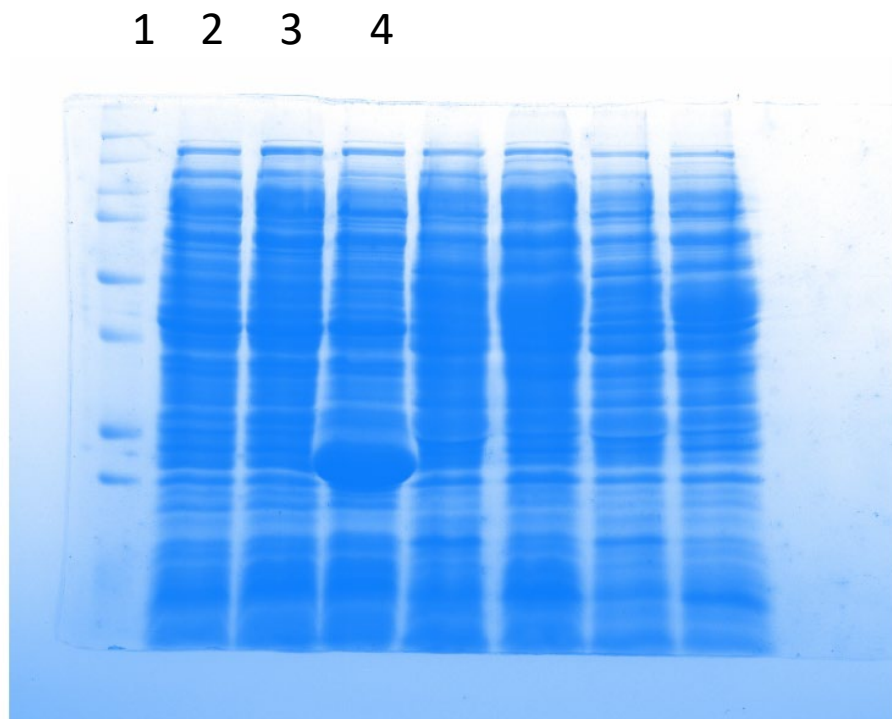

**Original image of Figure 1, panel (A).**

Line 1: molecular protein marker

Line 2: homogenate of non-transformed E. coli BL21.

Line 3: homogenate of E. coli BL21 transformed with empty vector.

Line 4: homogenate of E. coli BL21 transformed with pCold-ApoLpIII.

The gel was Coomassie blue-stained

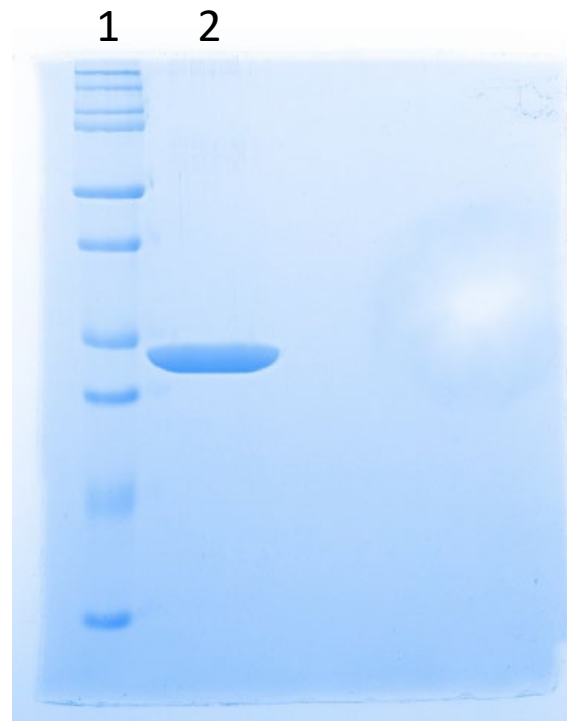

**Original image of Figure 1, panel (B).**

Line 1: molecular protein marker

Line 2: rApoLp-III purified and Coomassie blue-stained.

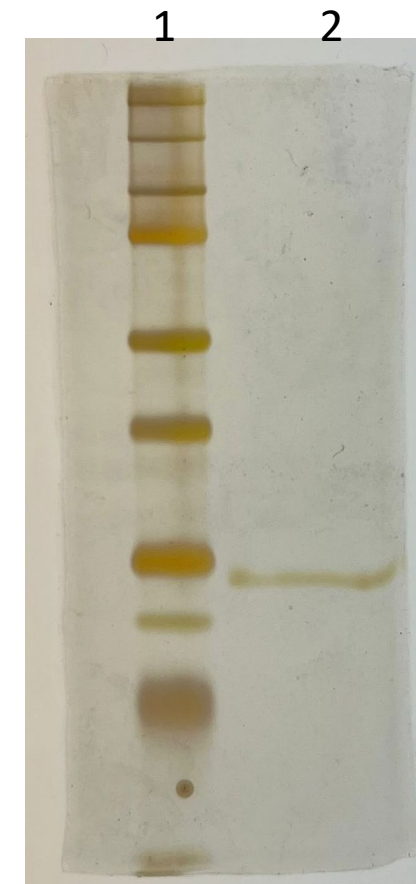

**Original image of Figure 1, panel (C).**

Line 1: molecular protein marker

Line 2: rApoLp-III purified and silver-stained.

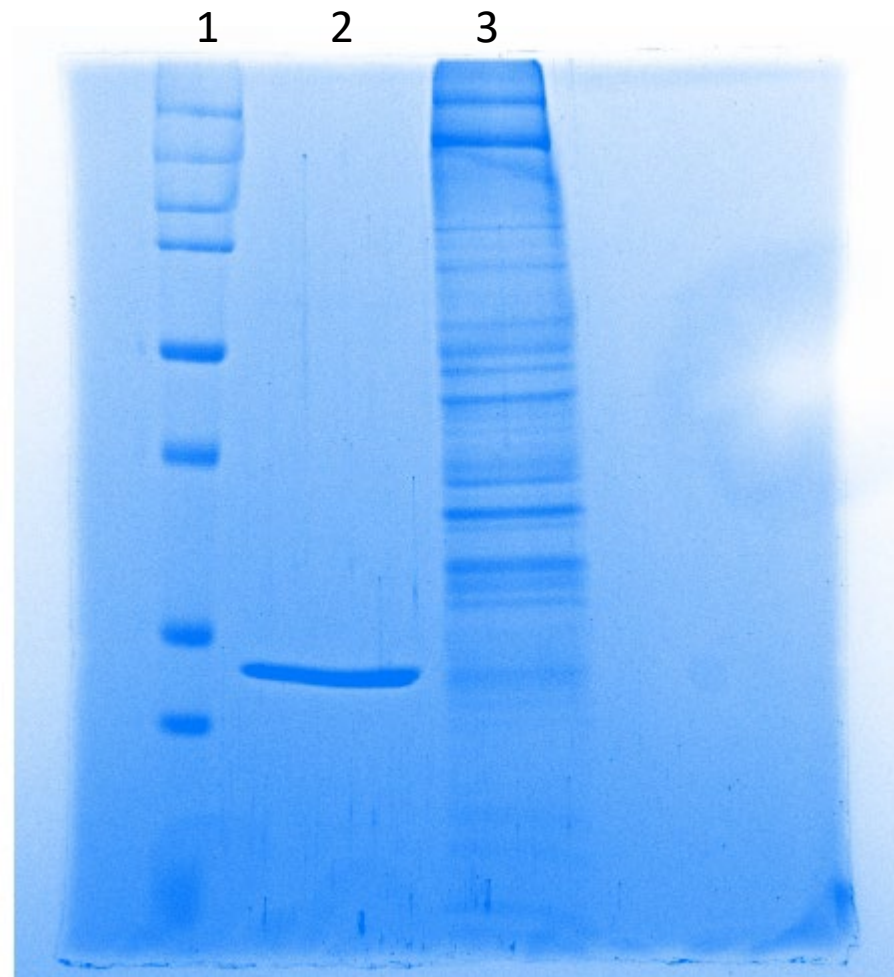

**Original image of Figure 2, panel (A).**

Line 1: molecular protein marker

Line 2: : rApoLp-III purified.

Line 3: *G. mellonella* moth's homogenate

The gel was Coomassie blue-stained

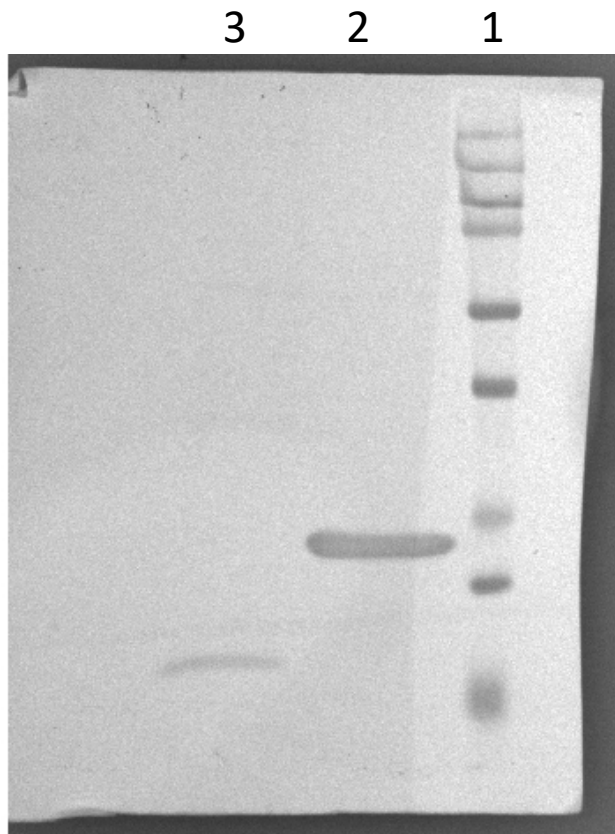

**Original image of Figure 2,  
panel (B)**

Line 1: molecular Protein  
marker

Line 2: rApoLp-III purified

Line 3: *G. mellonella* moth's  
homogenate

The membrane was incubate

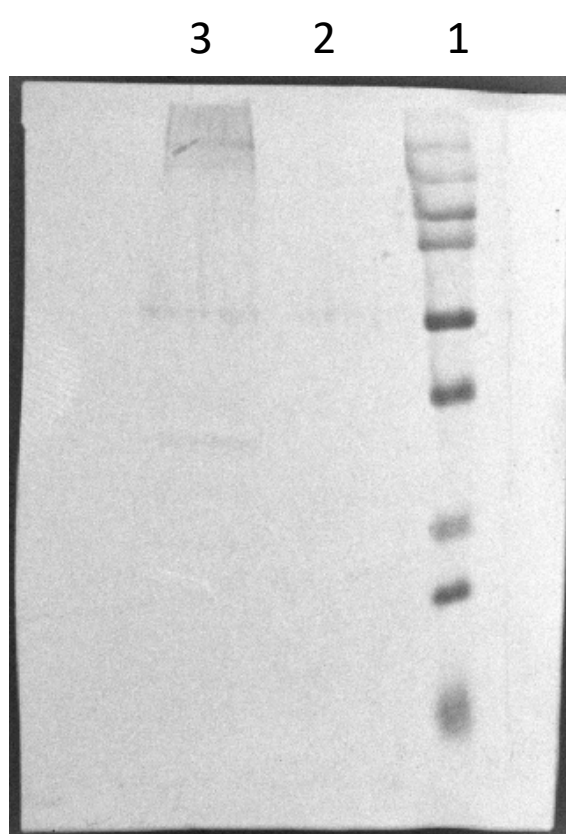

**Original image of Figure 2,  
panel (C)**

Line 1: molecular Protein  
marker

Line 2: rApoLp-III purified

Line 3: *G. mellonella* moth's  
homogenate

The membrane was incubated  
with pre-immune serum and

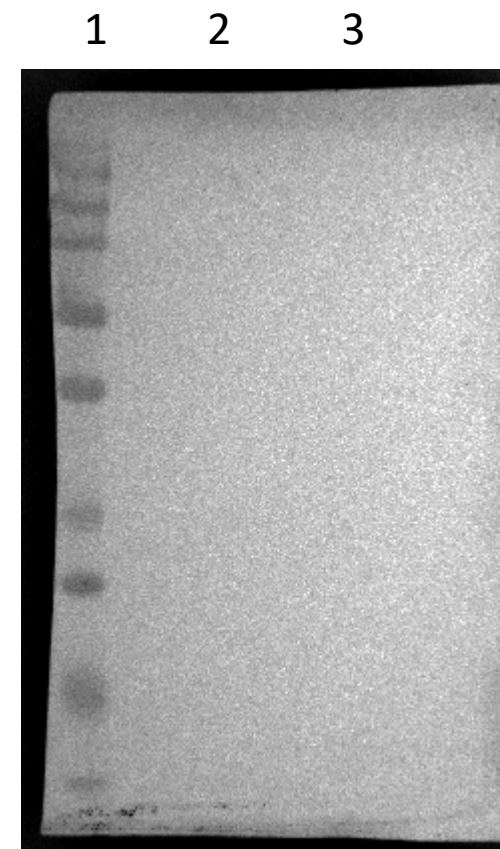

**Original image of Figure 2, panel (D)**

Line 1: molecular Protein marker

Line 2: rApoLp-III purified

Line 3: *G. mellonella* moth's  
homogenate

The membrane was incubated only  
with second antibody
